# Supplementary material for: Bioinformatics analysis of lncRNA‑associated ceRNA network in melanoma
Source: PubMed Central journal article supplement (PMC8040875; doi:10.7150/jca.51851), 2021-03-15
Supplement: jcav12p2921s1.pdf [file jcav12p2921s1.pdf]

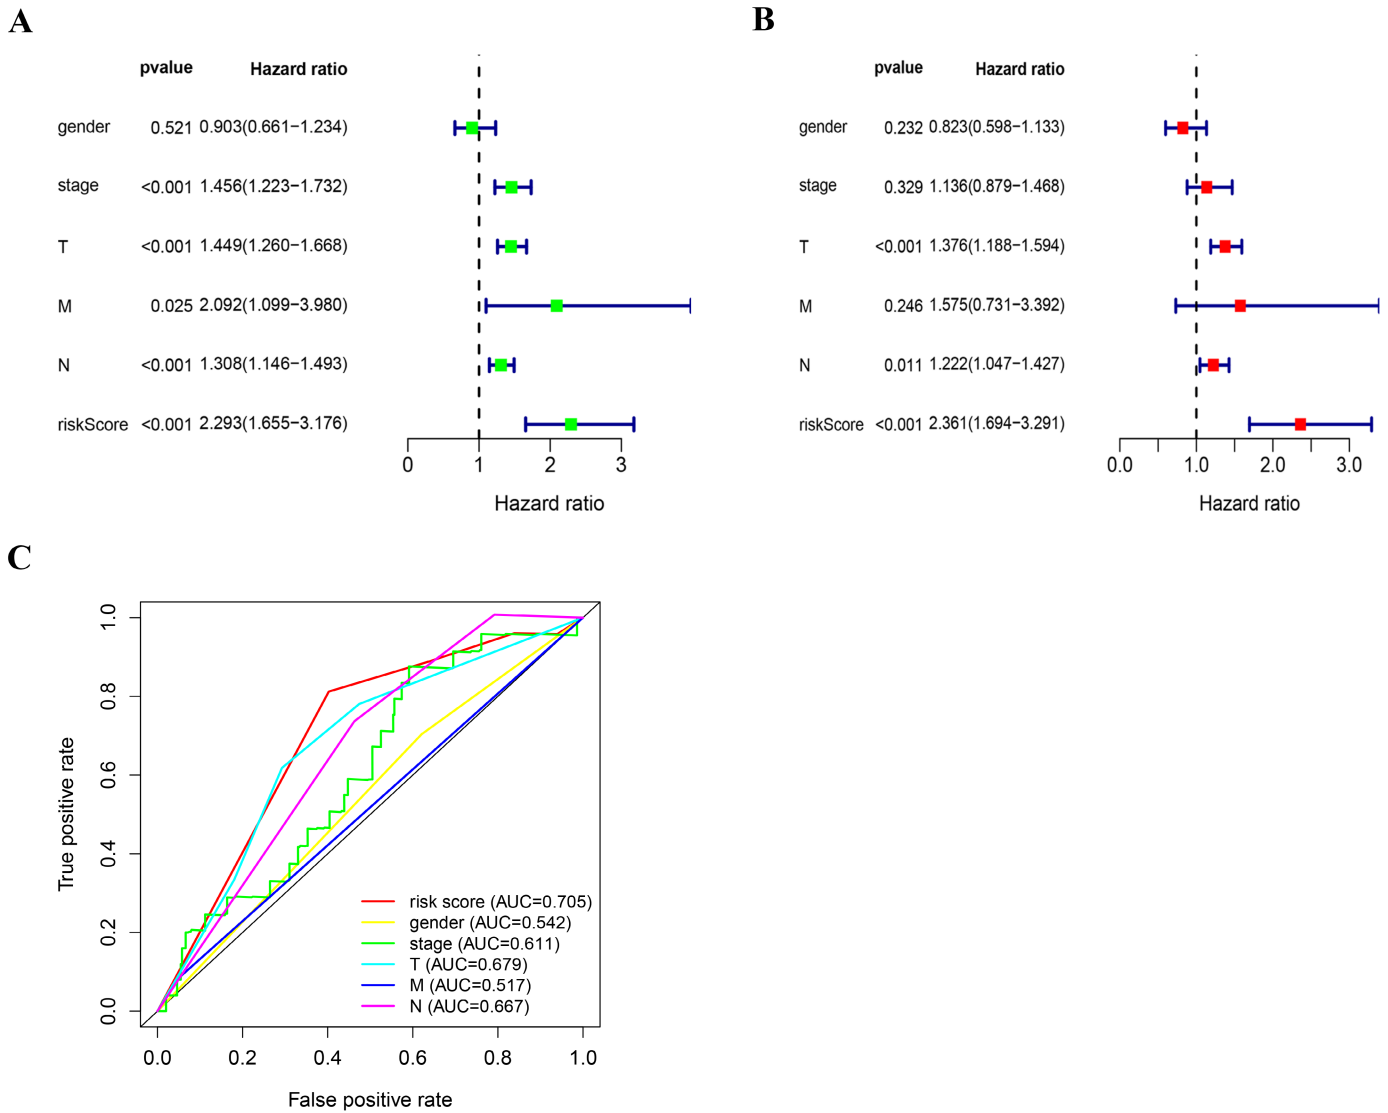

**Supplementary Figure 1. Independent prognostic analysis in melanoma.** (A) Forest plot of univariate COX analysis. (B) Forest plot of multivariate COX analysis (C) ROC curve and AUC. AUC, area under the curve; ROC, receiver operating characteristics.
